# Supplementary material
Source: Springer Nature journal article supplement (https://www.springerprofessional.de/resource/supplementary/13638_2010_4_MOESM12_ESM.pdf/11897256)

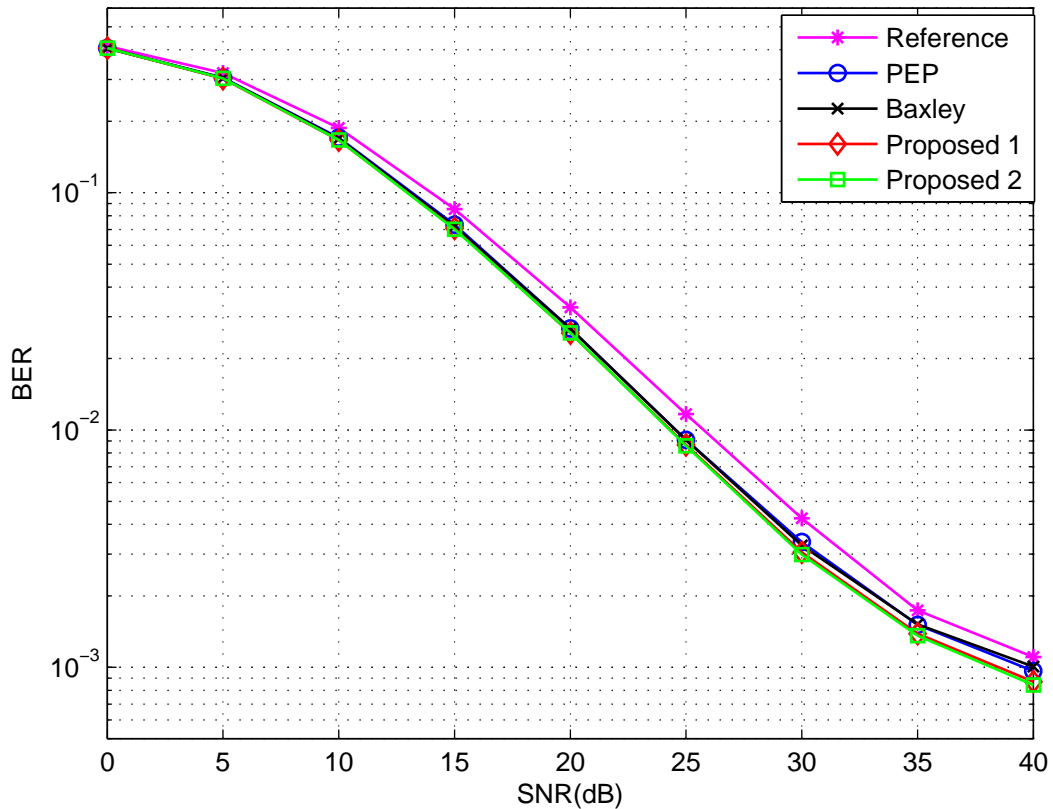

Supplement: MOESM12 [file 11897256]
